# Supplementary material for: Immunosuppressive PLGA TGF-β1 Microparticles Induce Polyclonal and Antigen-Specific Regulatory T Cells for Local Immunomodulation of Allogeneic Islet Transplants
Source: Front Immunol. 2021 May 27;12:653088. doi: 10.3389/fimmu.2021.653088 (PMC8190479; doi:10.3389/fimmu.2021.653088)
Supplement: Supplementary file 1 [file DataSheet_1.docx]

**Immunosuppressive PLGA TGF-β1 Microparticles Induce Polyclonal and Antigen-Specific Regulatory T Cells for Local Immunomodulation of Allogeneic Islet Transplants**

Ying Li#1-2, Anthony W. Frei#1, Irayme M. Labrada1, Yanan Rong1, Jia-Pu Liang1, Magdalena M. Samojlik1, Chuqiao Sun1, Steven Barash1, Benjamin G. Keselowsky1-3, Allison L. Bayer4-5, Cherie L. Stabler*1-3.

1J. Crayton Pruitt Family Department of Biomedical Engineering, University of Florida, Gainesville, FL, USA.

2Graduate Program in Biomedical Sciences, College of Medicine, University of Florida, Gainesville, FL, USA.

3University of Florida Diabetes Institute, Gainesville, FL, USA.

4Diabetes Research Institute, University of Miami, Miami, FL, USA.

5Department of Microbiology and Immunology, University of Miami, Miami, FL, USA.

**SUPPLEMENTAL DOCUMENTS**

**Supplemental Methods**

***Endotoxin Quantification***

Endotoxin levels of TGF-β1/PLGA MPs were tested on the supernatant of the particles. Briefly, 1 mg particles were incubated in 200 µL sterile cell culture water (Corning) in a 96-well plate for 48 hours, after which the water supernatant was collected via centrifugation at 500×g for 5min. The supernatant was tested for endotoxin via LAL Chromogenic Endotoxin Quantitation Kit following the manufacturer's instructions (ThermoFisher).

**Supplemental Tables**

**Table S1**. Variations in PLGA Microparticle Formulation

| **Formulation ID** | **Polymer Viscosity** | **Polymer**  **(L:G Ratio)** | **TGF-beta1**  **(ng/mg PLGA)** | **Additives** |
| --- | --- | --- | --- | --- |
| A | 0.45 dL/g | 50:50 | 20 | - |
| B | 0.2 dL/g | 100:0 | 20 | - |
| C | 0.2 dL/g | 50:50 | 20 | - |
| D | 0.2 dL/g | 75:25 | 20 | - |
| E | 0.45 dL/g | 50:50 | 20 | 2% NaCl |

**Table S2**. List of Antibodies


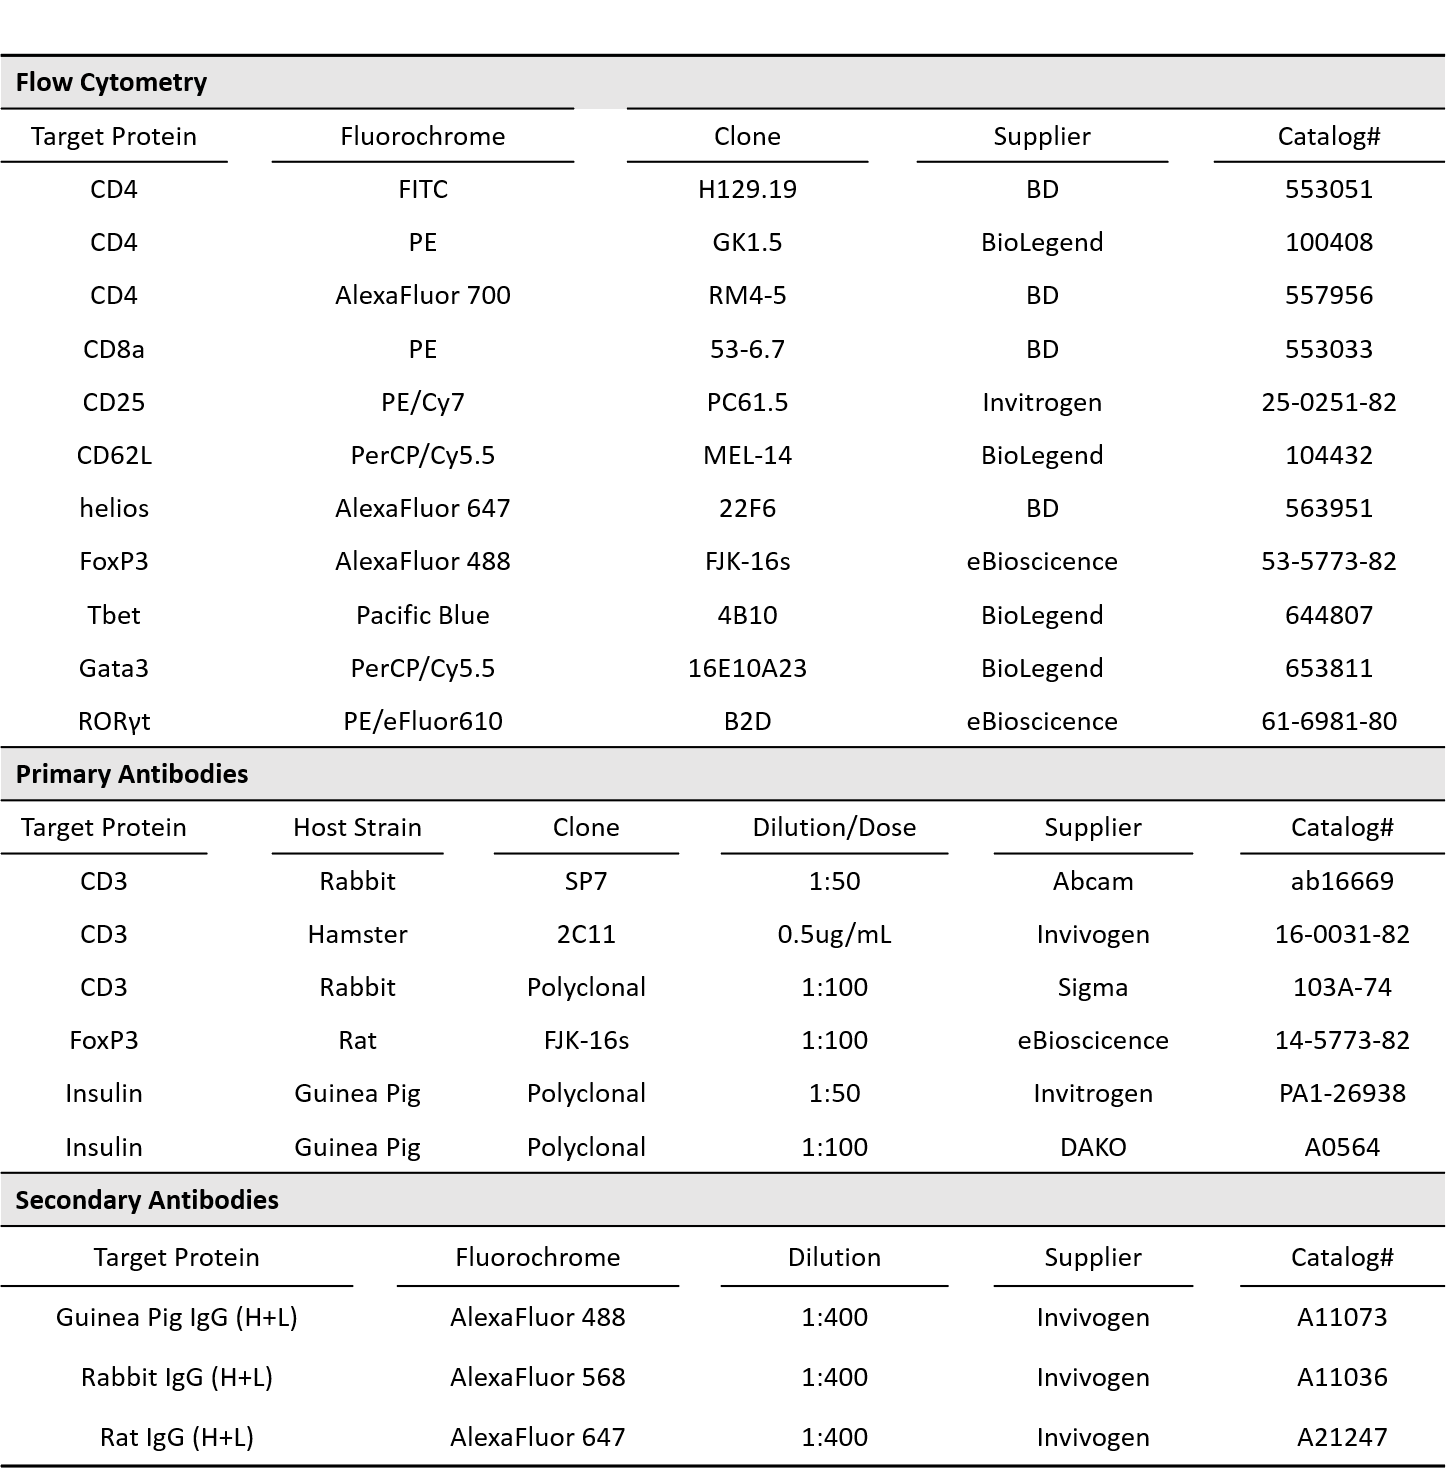


**Table S3.** Endotoxin Quantification of TGF-β1/PLGA Microparticles


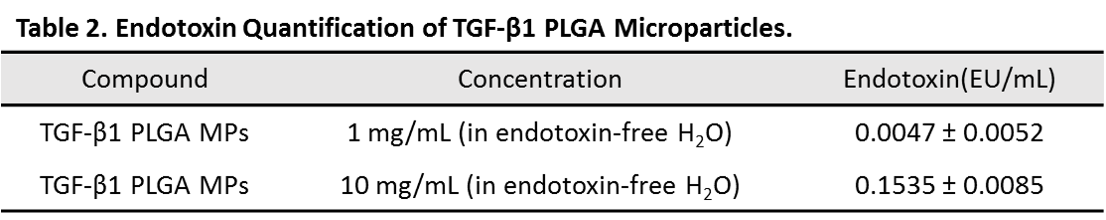


**Table S4.** TGF-β1 Quantification in Treg Conversion Assay.


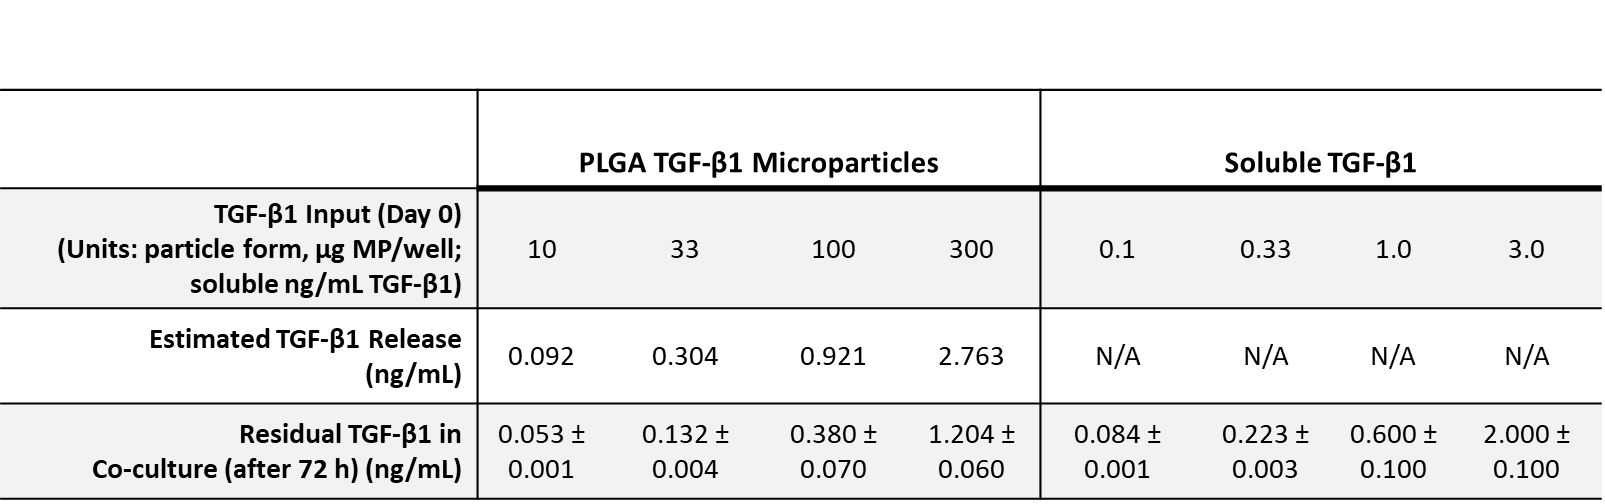


Note: ”Estimated” TGF-β1 released values are theoretical levels based off of kinetic release curves. “Residual” TGF-β1 values are experimentally measured levels within TGF-β1-MP or sTGF-β1 control wells that contained only T cell media

**Supplemental Figures**


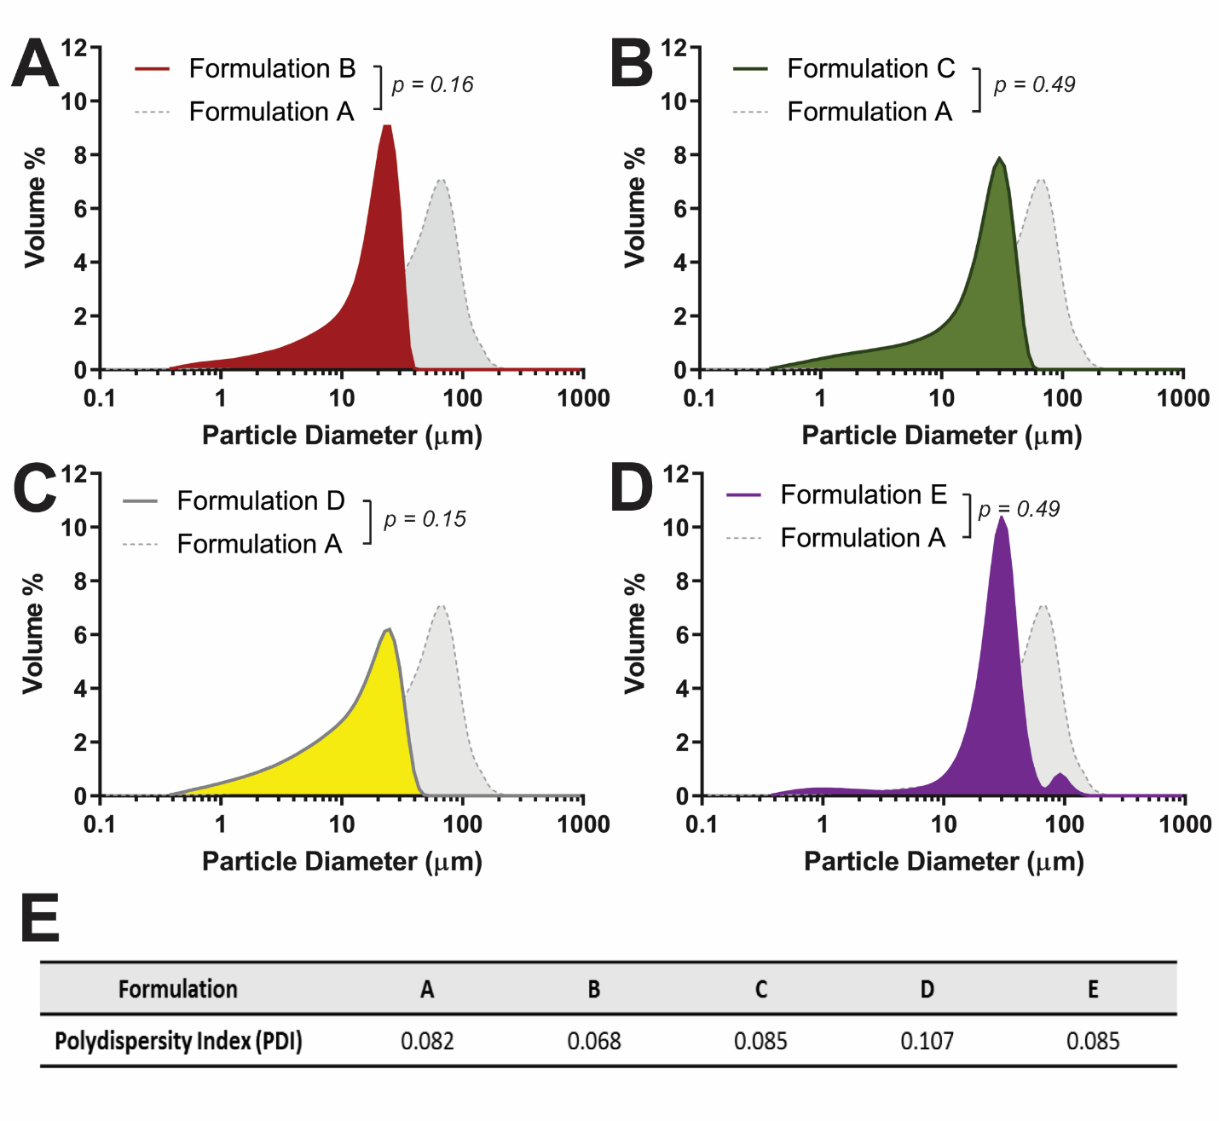


**Figure S1.** **Size Distribution of modified formulations of TGF-β1/PLGA microparticles.** Particle diameter was determined by laser diffraction. Differential volume % from 0 to 2000 µm shown for A) Formulation B, B) Formulation C, C) Formulation D, and E) Formulation E microparticles. E) Polydispersity index for particles of different formulations. Compilation of n = 3 runs per formulation shown.

**
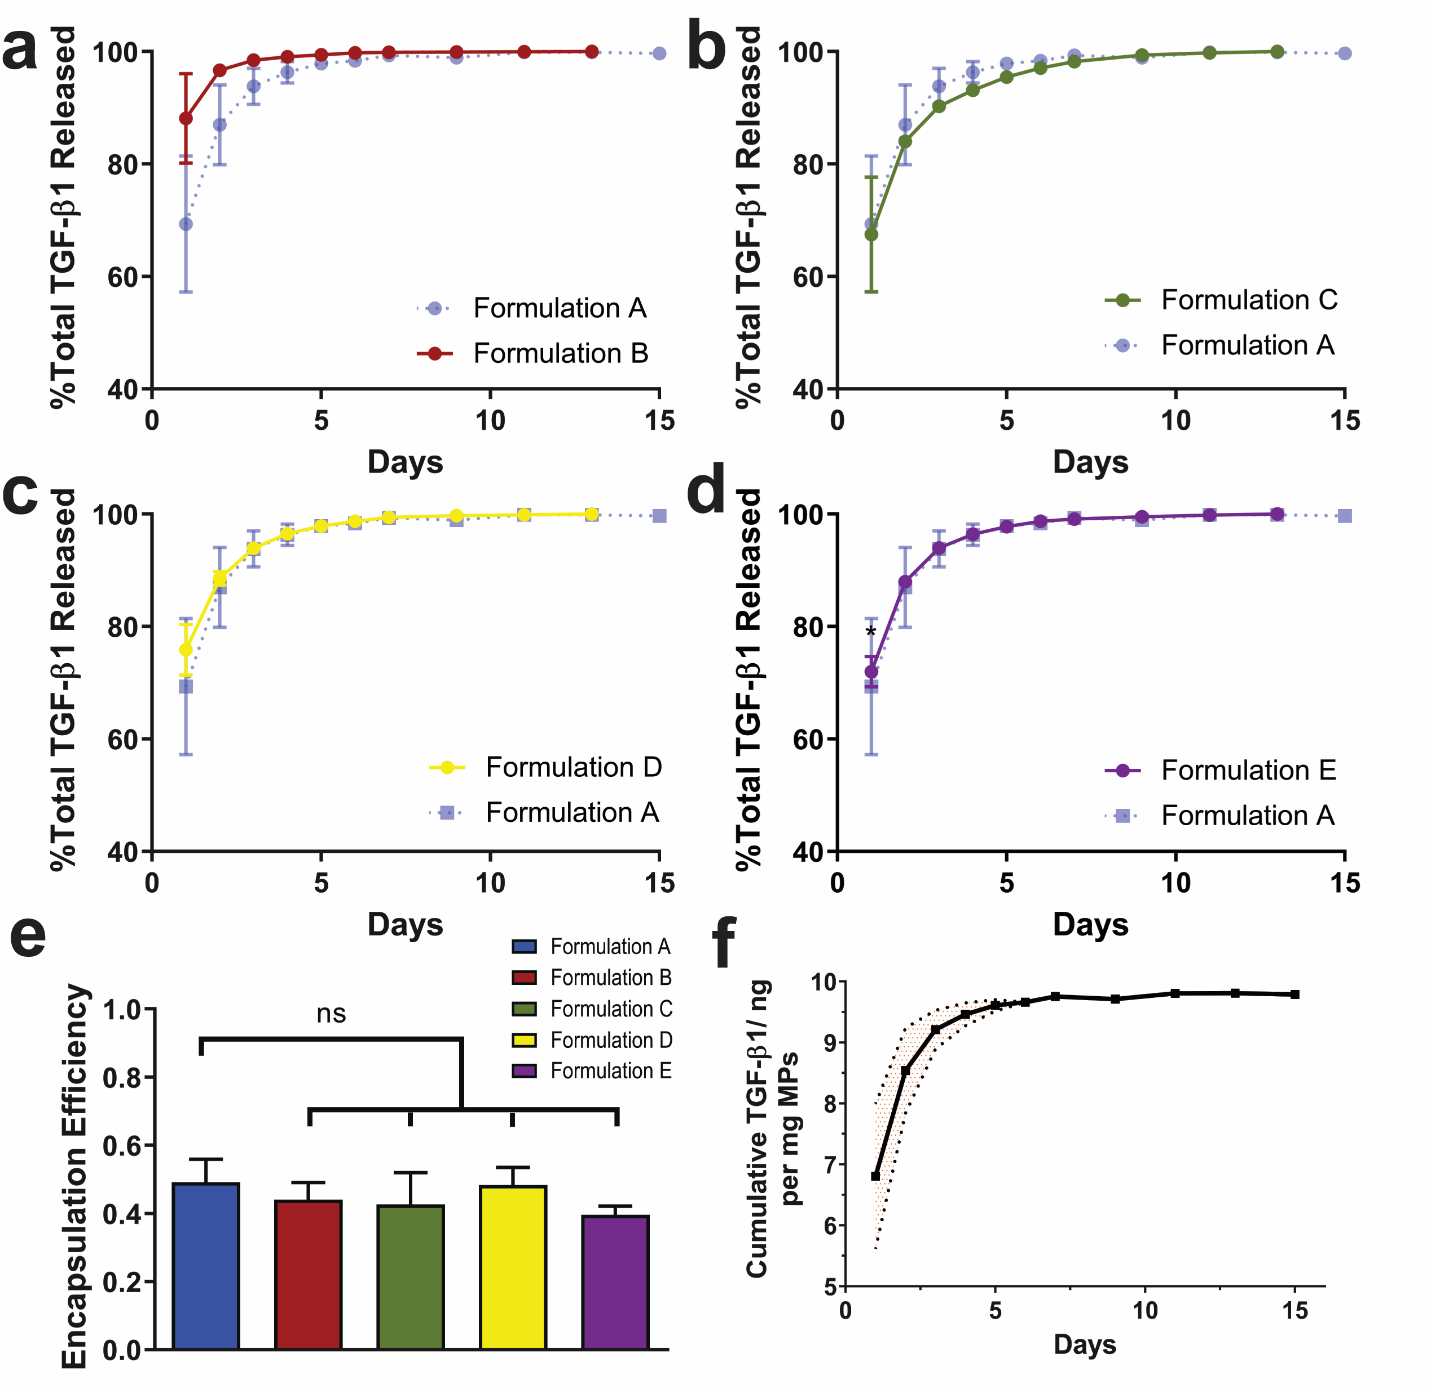
**

**Figure S2. Kinetic Release Profiles and Drug Encapsulation Efficiency of Modified TGF-β1 Microparticle Formulations, compared to baseline Formulation A.** TGF-β1 release profiles of formulation B (a), formulation C (b), formulation D (c), and formulation E (d). All profiles are normalized to total TGF-β1 release over 60 d, with release compared to baseline formulation A (blue dashed line). n=3 per time point. ns = not significant. (e) Summary of TGF-β1 encapsulation efficiency for all five PLGA microparticle formulations. (f) Cumulative release of TGF-β1 ng normalized to particle weight. Mean TGF-β1 release curve (black line) was acquired by averaging four independent (N=4, n=13) studies with particles of different batches, with standard deviation (shading) as shown.


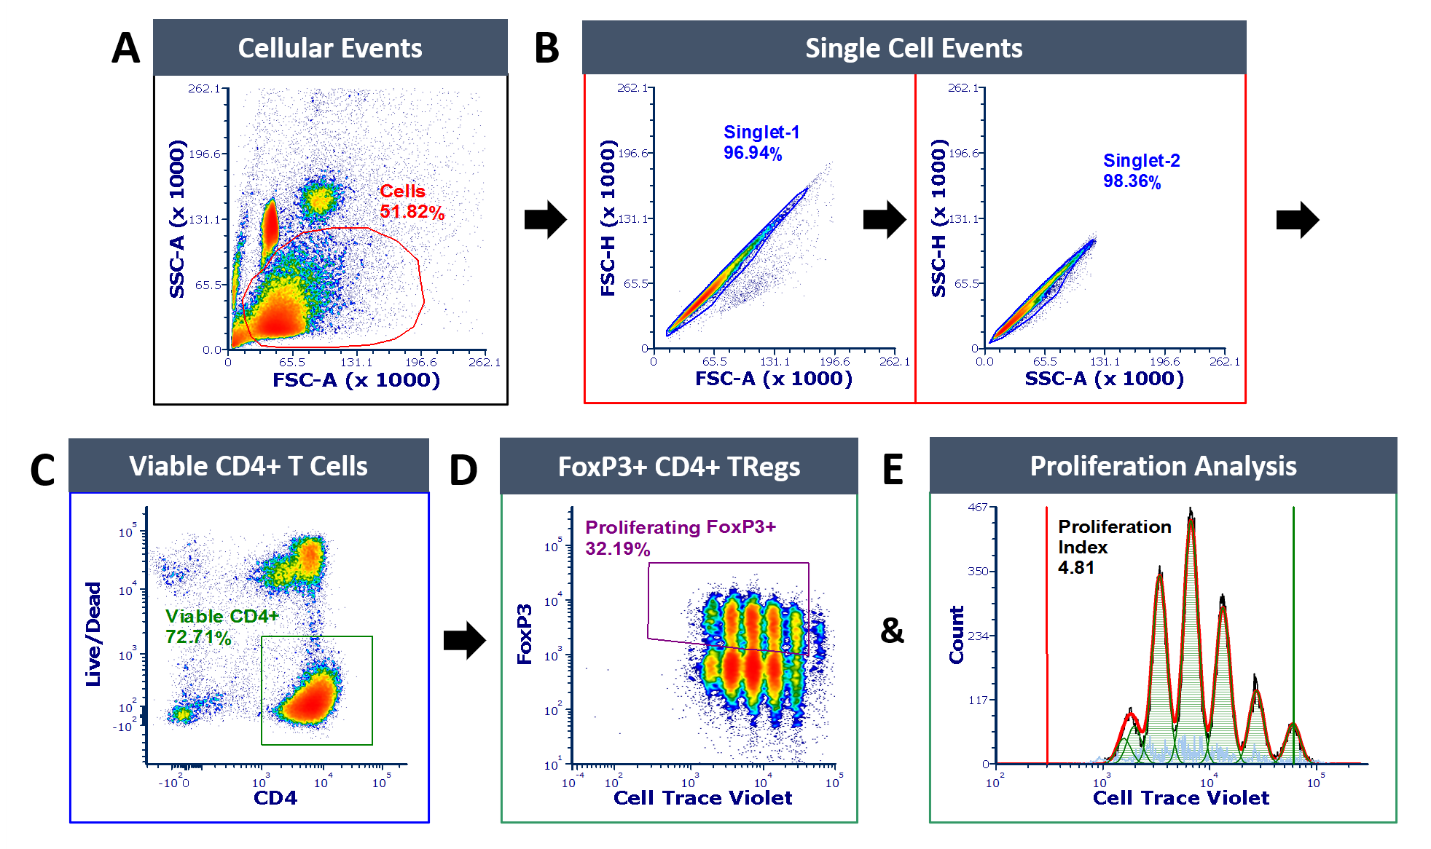


**Figure S3. Representative Flow Cytometry Gating for Enumeration of iTregs.** Sequential gating strategies were applied to quantify the frequency of Tregs induced by PLGA MPs released or soluble TGF-β1. (A) Set a polygon gate to identify the lymphocyte population and exclude debris. (B) Exclusion of cell doublets and aggregation. (C) Viable CD4+ T cells were identified as CD4 positive and Live/Dead negative. (D) Proliferating (excluding generation 0) FoxP3 expression on viable CD4+ T cells; (E) Proliferation analysis on viable CD4+ T cells, where black line = histogram contour of raw data; orange line = fitted data; light blue = noise events; green shaded area = area under the fitted curve; green marker = undivided marker and red marker = background marker. The analysis was performed using FCS Express 6.05 software. The boundary of the gates is determined by isotype controls, fluorescence-minus-one (FMO) controls and the unstimulated control.


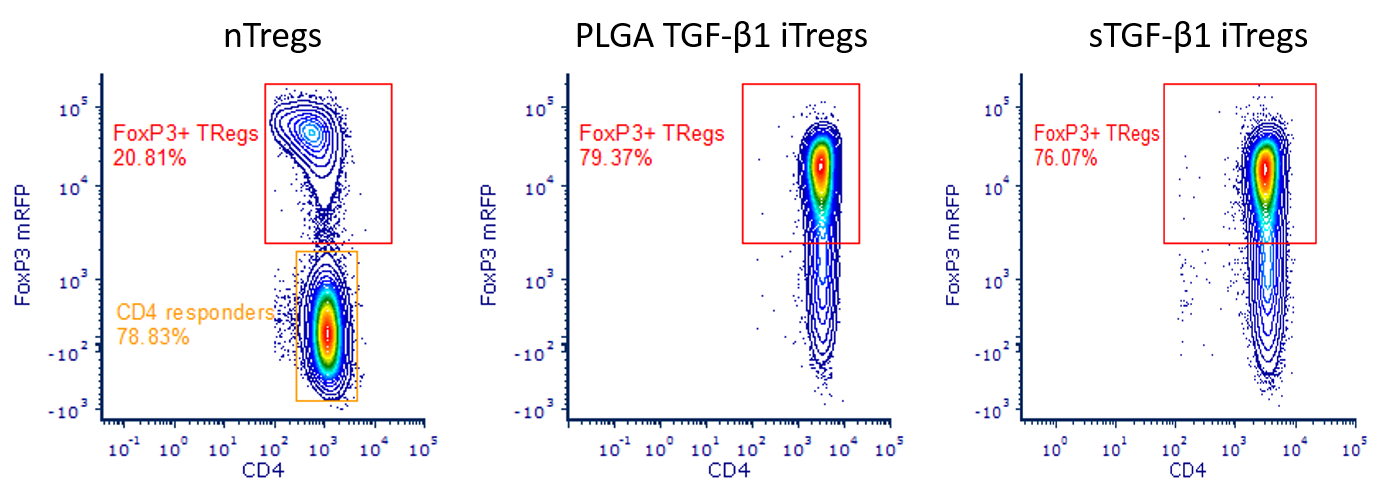


**Figure S4. Representative Flow Cytometric Sorting to Purify FoxP3+ Regulatory T Cells and FoxP3- Responder T cells.** Freshly isolated B6-FIR lymphocytes and B6-FIR naïve CD4+ T cells post Treg conversion were used for sorting. Cell debris and aggregates were excluded by serial gating. Then viable CD4+ T cells were identified base on signals of CD4-FITC and Live/Dead IR dye staining. FoxP3 expression was identified by the endogenous mRFP signal. CD4+FoxP3+ cells of the different sources (as noted) were sorted out as suppressors, while the CD4+FoxP3- cells were used for responder cells. Gating boundaries were determined based on fluorescence-minus-one (FMO) controls and the unstimulated control with proper compensation. Three independent sorts were performed using BD FACSAria II Sorter with an efficiency of over 98%.


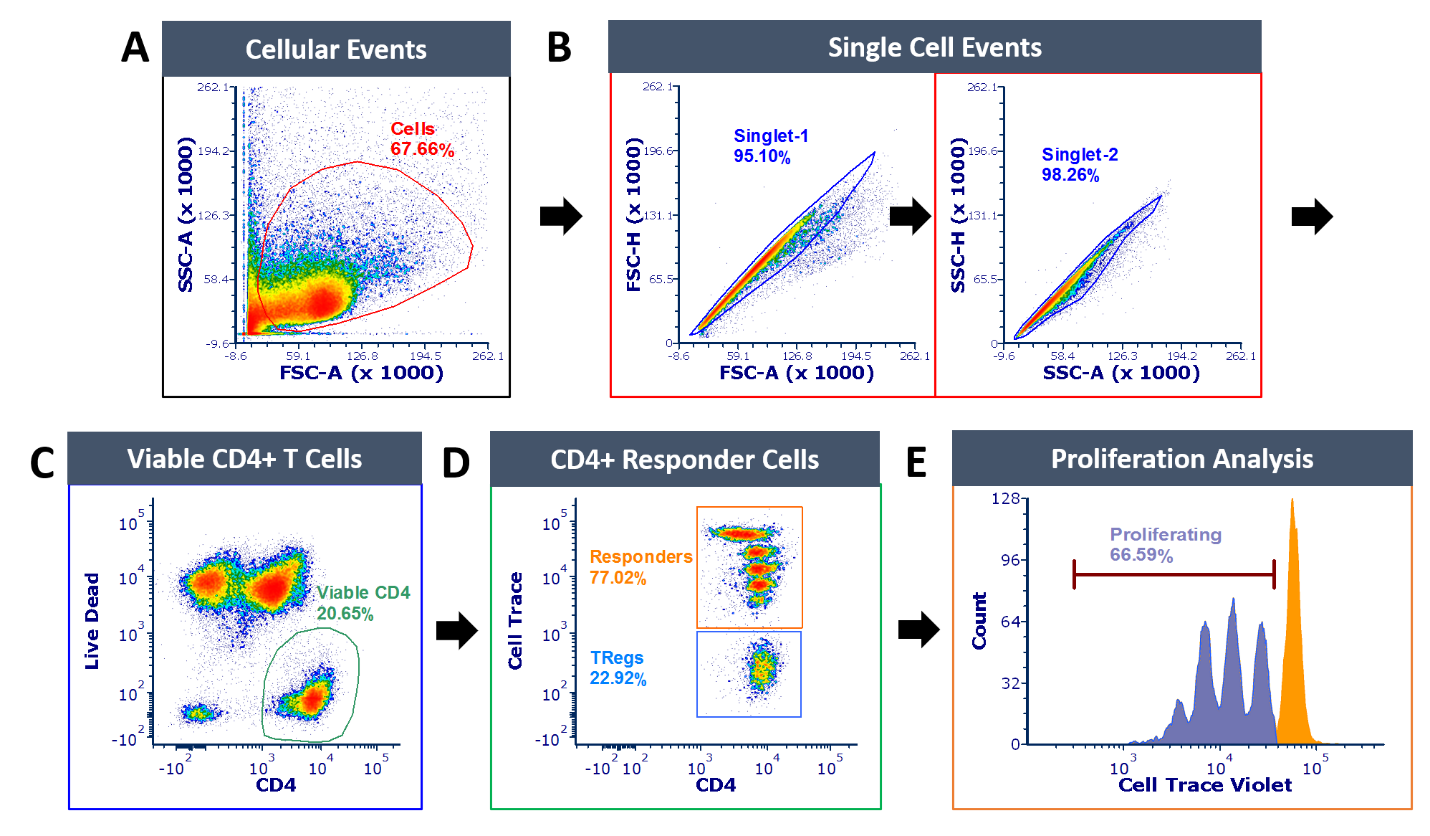


**Figure S5. Representative Flow Cytometry Gating for Treg Suppression Assay.** Sequential gating strategies were applied to assess the suppressive function of Tregs induced by PLGA MPs released or soluble TGF-β1, compared to natural Tregs. (A) Set a polygon gate to identify the lymphocyte population and exclude debris. (B) Exclusion of cell doublets and aggregation. (C) Viable CD4+ T cells were identified as CD4 positive and Live/Dead negative. (D) CD4+ responder cells were identified as CD4 and CellTrace Violet double positive. (E) Frequency of proliferating (excluding generation 0) CD4+ responder cells were quantified using histogram. The analysis was performed using FCS Express 6.05 software. The boundary of the gates is determined by isotype controls, fluorescence-minus-one (FMO) controls.


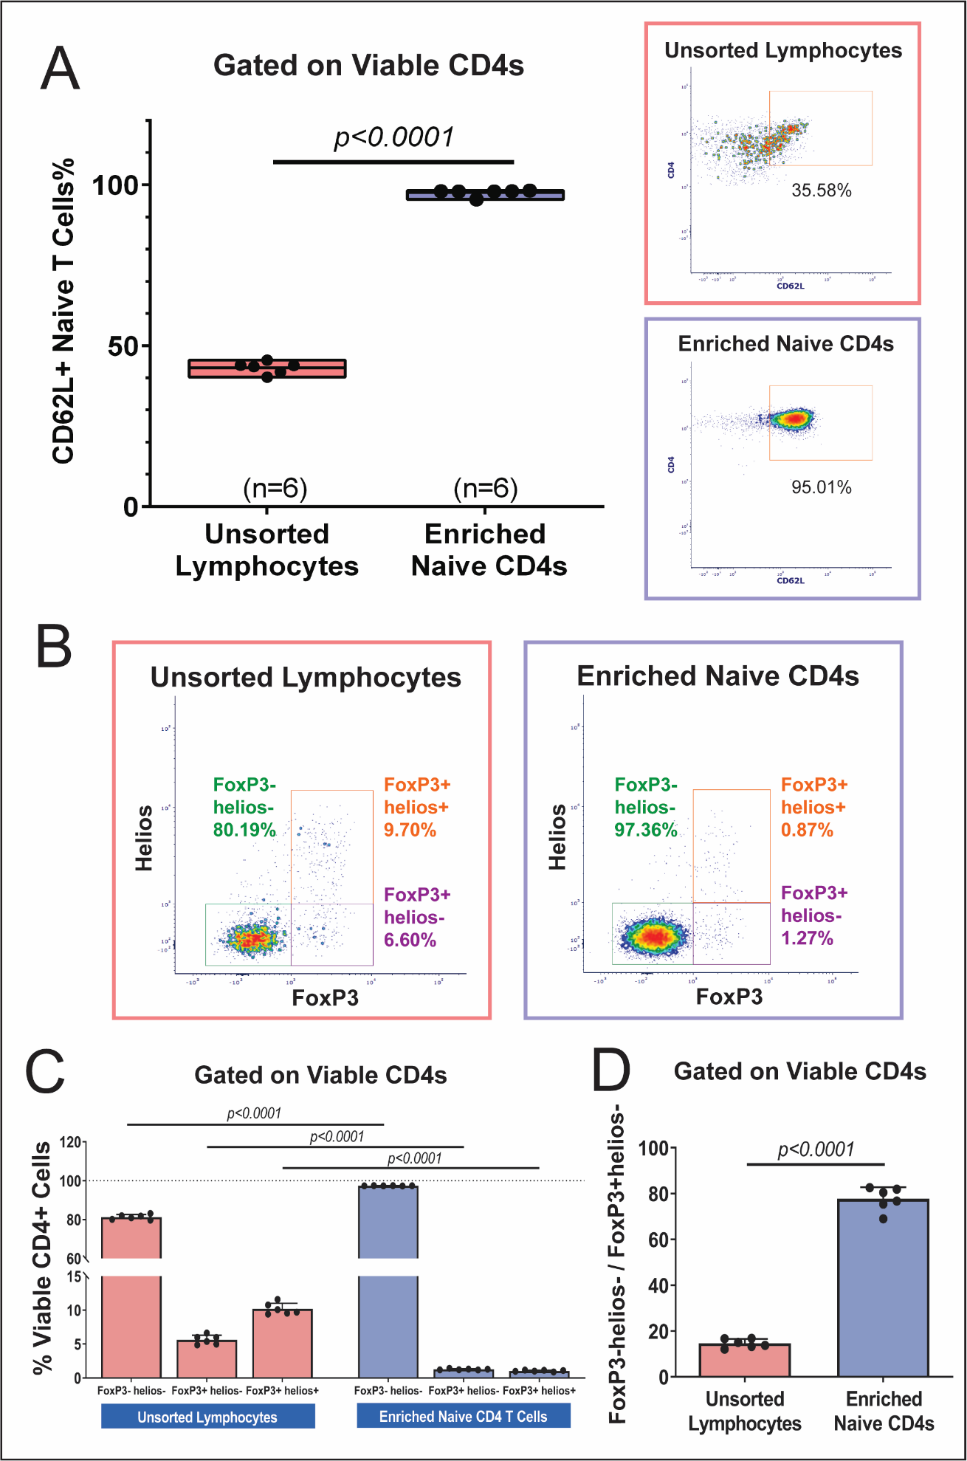


**Figure S6. Purity of Magnetically Sorted Naïve CD4+ T Cells for Treg Conversion Assay.** (A) Frequency of naïve CD4+ T cells (LiveDead-CD4+CD62L+) before (pink bar) and after (blue bar) magnetic purification with StemCell negative selection kit, with representative cytometric density plots. (B) Representative gating of CD4+FoxP3-helios-, CD4+FoxP3+helios+, and CD4+FoxP3+helios- cells before (pink box) and after (blue box) magnetic purification with (C) summarized quantification (n=6). (D) Ratio between Foxp3-helios- and FoxP3+helios- CD4+ T cells before and after magnetic purification (n=6).


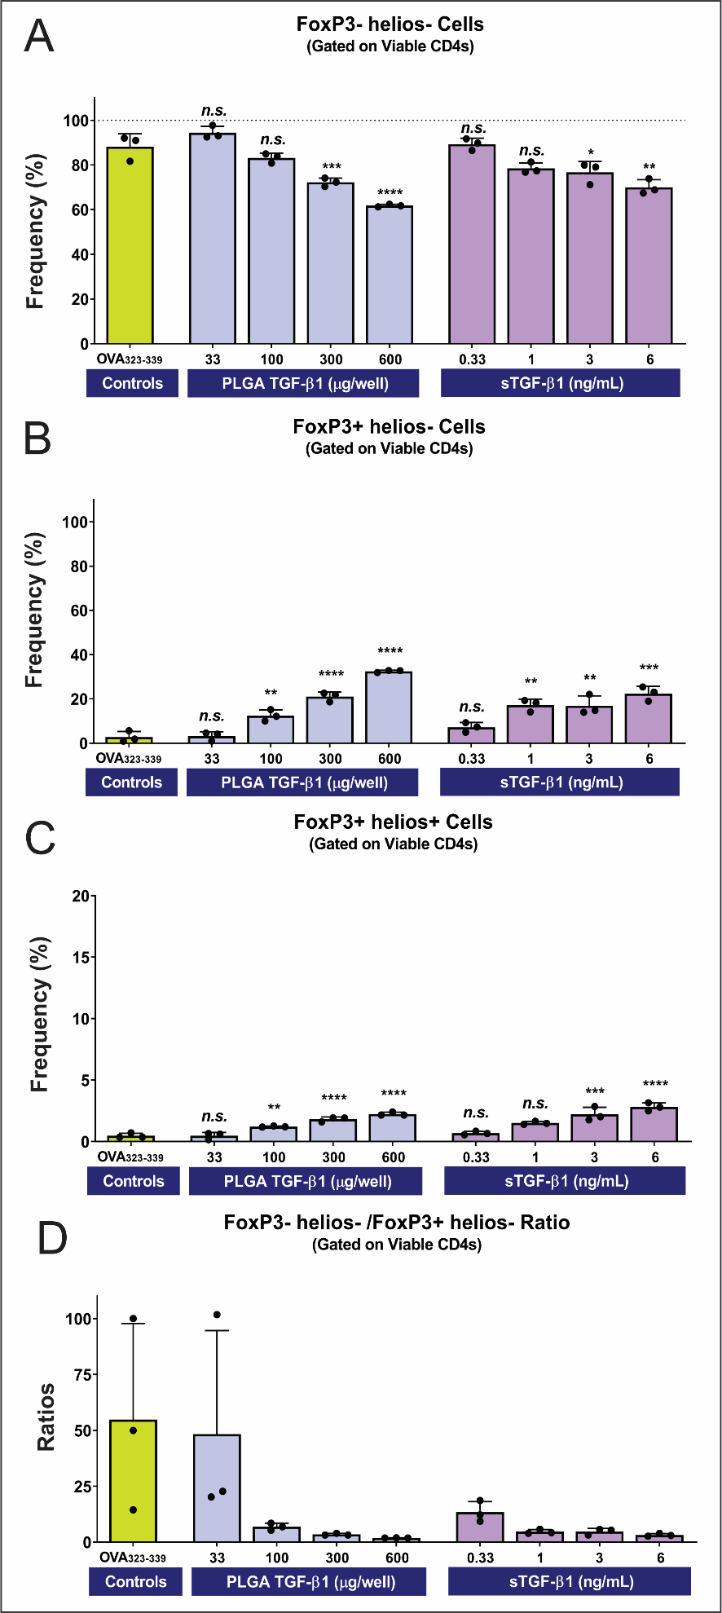


**Figure S7. FoxP3 and helios Expression on CD4+ T cells post in vitro Tregs Conversion using PLGA MPs Releasing or Soluble TGF-β1.** Summary of the frequency of OTII (A) CD4+FoxP3-helios-, (B) CD4+FoxP3+helios- and (C) CD4+FoxP3+helios+ cells post in vitro conversion by TGF-β1 PLGA MPs (n=3) or soluble TGF-β1 (n=3). Paired Tukey’s test was conducted for mean comparison, with * is used when compared to control group (OVA323-339 peptide and APCs only). Statistical significance was determined as ****p < 0.0001, ***p < 0.001, **p < 0.01 and n.s. = not significant. (D) Ratio between FoxP3-helios- and Foxp3+helios- CD4+ T cells before and after the three-day in vitro Treg conversion.


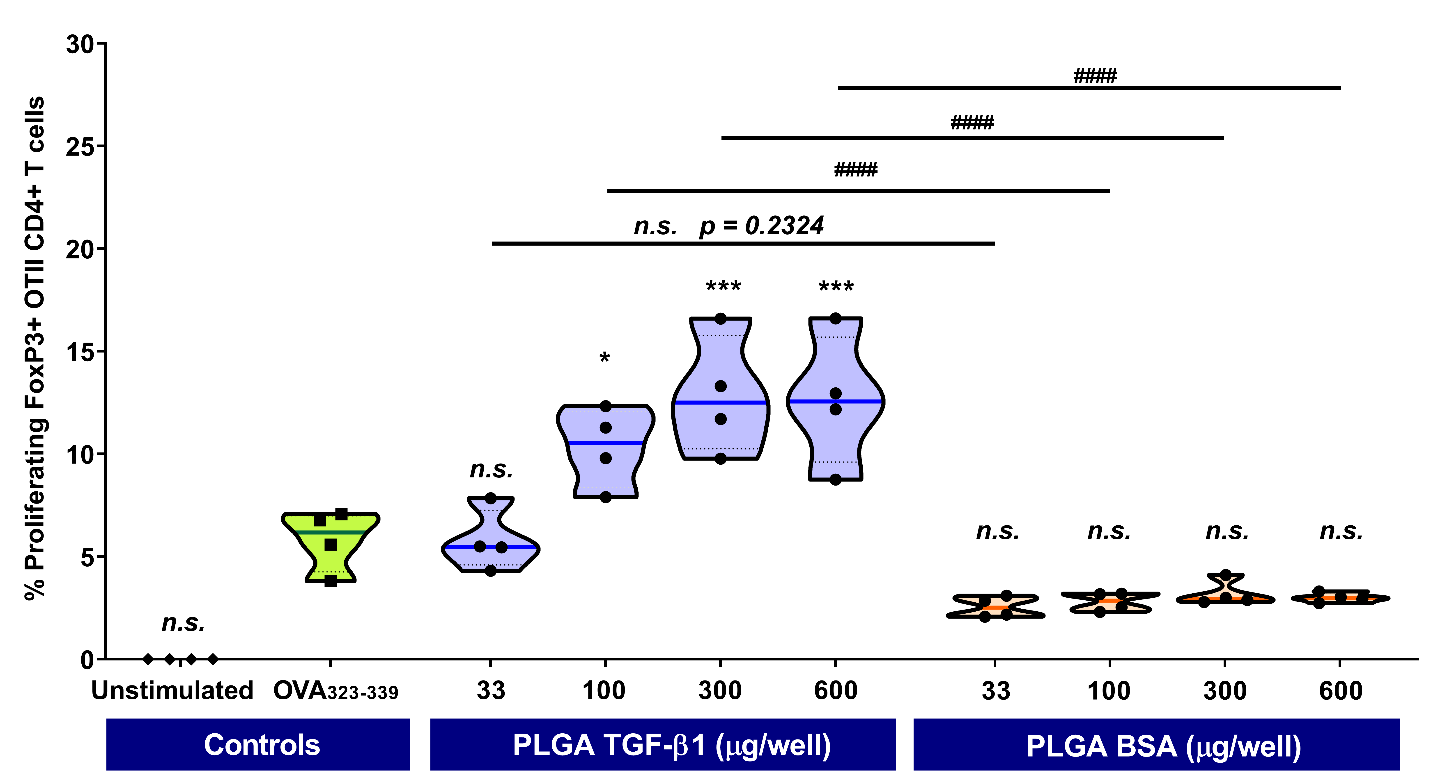


**Figure S8. iTreg Conversion by PLGA MPs is TGF-β1 Specific.** Frequency of OTII CD4+FoxP3+ iTreg conversion by BSA PLGA MPs vehicle controls compared to TGF-β1 PLGA MPs (n=4).


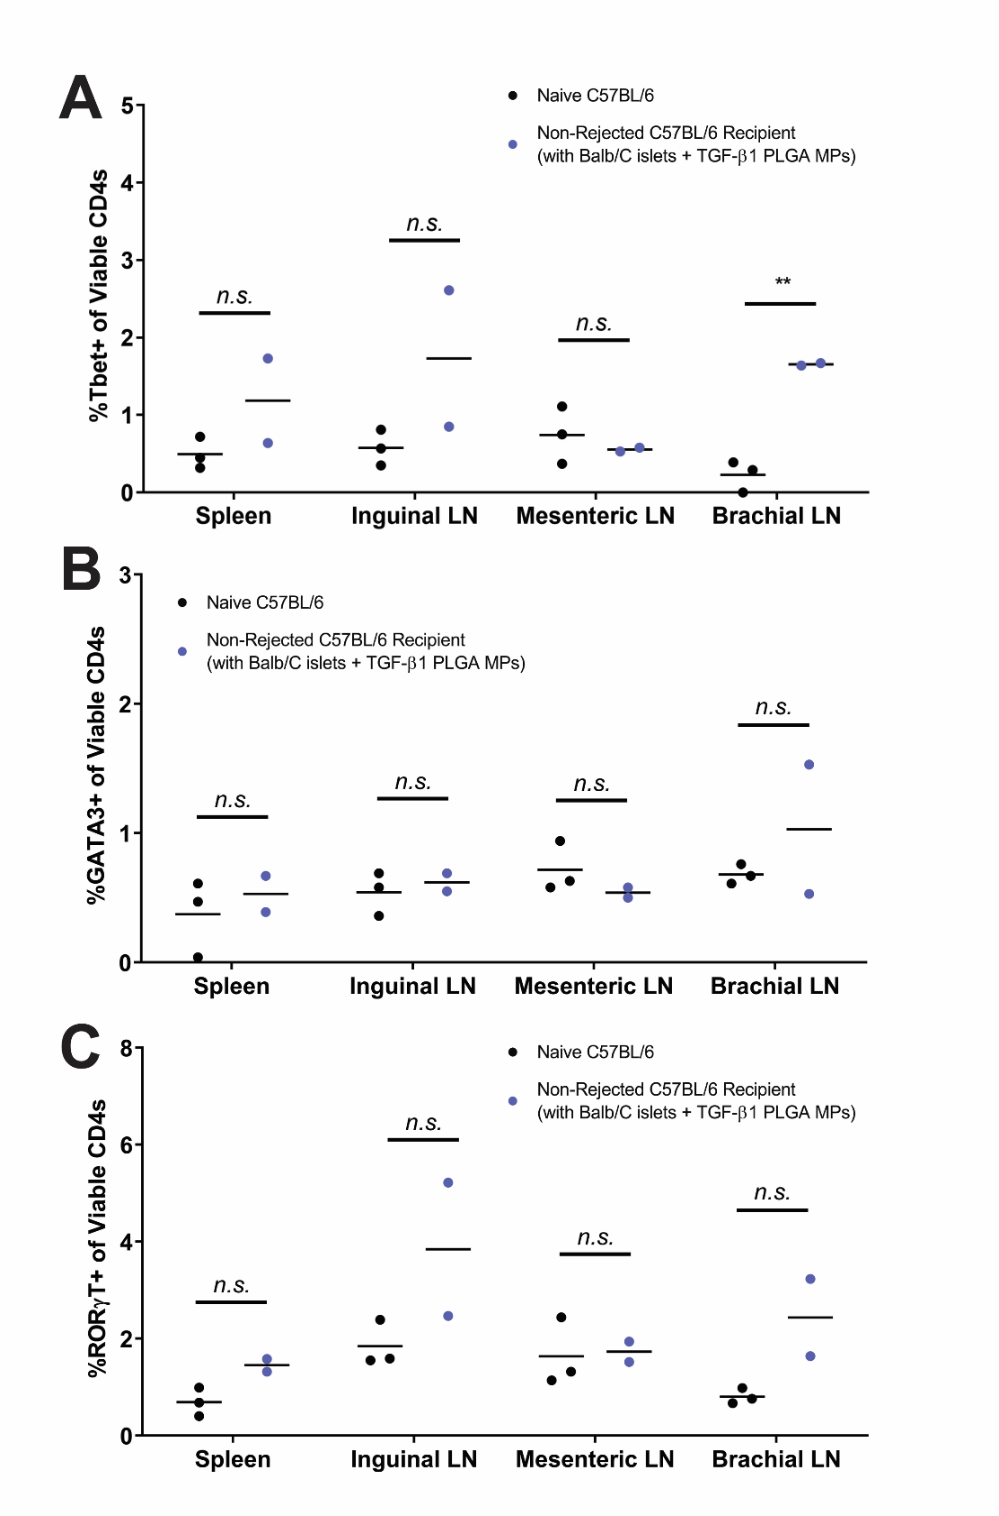


**Figure S9. Phenotype of CD4+ T Cells in Spleens and LNs Harvest from Long-term Allogeneic Islet Graft Recipients treated with TGF-β1 PLGA MPs.** Frequency of (A) Tbet+, (B) GATA3+ and (C) RORγt+ CD4+ T cells in spleens and lymph nodes of non-transplanted controls (black, n=3) and the long-term allogeneic islet graft survivors (blue, n=2) treated with TGF-β1 PLGA MPs.
